# Supplementary material
Source: publisher figshare collection journal article supplement (https://tandf.figshare.com/ndownloader/files/9959752)
Supplement: Supplementary file 1 [file 9959752]

**Supplementary material**

**Table S1.** Nucleotide sequences of the primers used for genotyping SALK mutants.

| **AGI (Gene locus)** | **Primer ID** | **Nucleotide sequence** (5’-3’) |
| --- | --- | --- |
| *RAPTOR3g*  (At3g08850) | RP | CATCGGATCAAGTTGCTTACC |
| LP | CAATATGAAGCTGCGGCTAAC |
| *LST8-1*  (At3g18140) | RP | ATCTAGCTGCAGCTTGCAATC |
| LP | AGCTTCGAAAAGGAGAGGATG |
| *LST8-2*  (At2g22040) | RP | CCTTTTCTCAGCAATTTAAAATTTC |
| LP | TGCTCTGAGATCCCATACACG |
| T-DNA | LBb1.3 | ATTTTGCCGATTTCGGAAC |

**Figure S1**

**Figure S1.** **Estradiol did not affect the progression of *Fusarium* infection in WT plants.** Leaves of 3-weeks-old WT seedlings and *tor-es* mutant were inoculated with *Fusarium* (5 μl of 1-5 × 105 conidia/ml suspension) or with water (control) and the number of the infected leaves was measured at 7 dpi. WT leaves were treated with estradiol 24 h previous to infection (+E) and *tor-es* leaves were not treated with estradiol (-E, control of non-induction of RNAi). Standard error bars (SE) are indicated.

EC: estradiol-treated leaves, EI: estradiol-treated leaves and inoculated with *Fusarium*, -EC: leaves not treated with estradiol, -EI: leaves not treated with estradiol and inoculated with *Fusarium*.
